# Supplementary material
Source: HighWire-hosted journal article supplement (https://cmaj.ca/highwire/filestream/79120/field_highwire_adjunct_files/0/202308-five-1-at.pdf)
Supplement: 202308-five-1-at.pdf [file 202308-five-1-at.pdf]

## Appendix

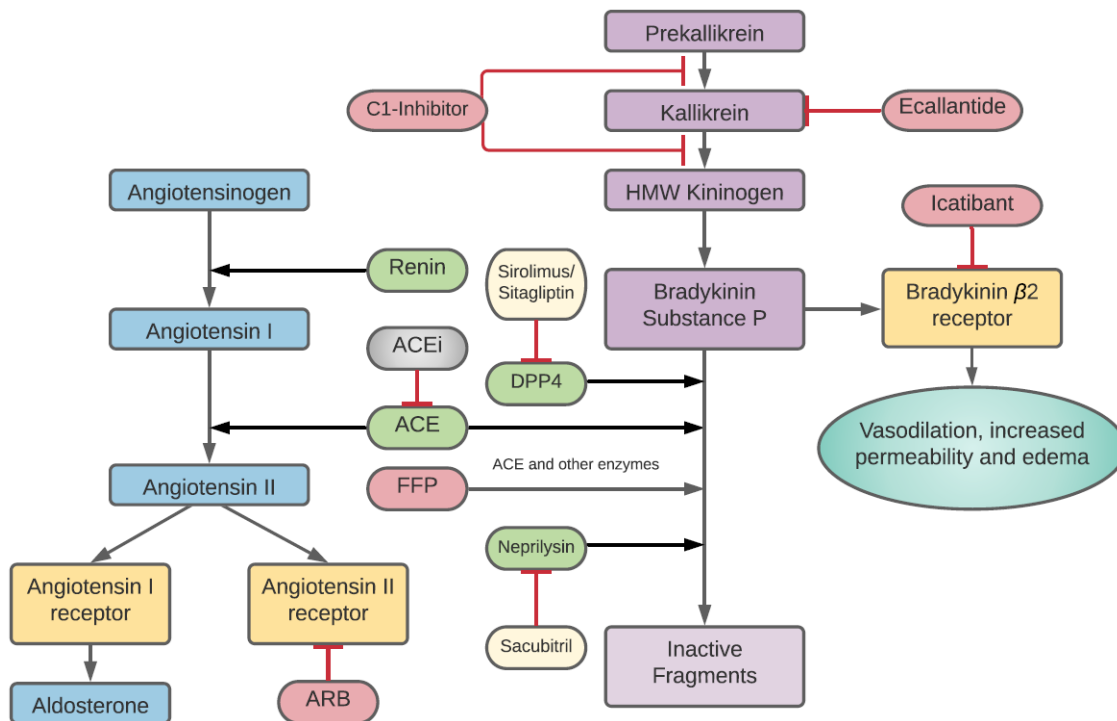

**Figure 1** – The renin-angiotensin-aldosterone system and kinin-kallikrein system. ACE-inhibitors (ACEi) slow the degradation of bradykinin leading to increased bradykinin  $\beta$ 2 receptor activation and increased vascular permeability (1-3). Candidate treatments for ACEi angioedema are highlighted in red.

ACE – angiotensin converting enzyme; ACEi – ACE-inhibitor; FFP – fresh frozen plasma; HMW – high molecular weight; DPP4 – dipeptidyl peptidase-4; ARB – angiotensin II receptor blocker.

1. Craig TJ, Bernstein JA, Farkas H, Bouillet L, Boccon-Gibod I. Diagnosis and treatment of bradykinin-mediated angioedema: outcomes from an angioedema expert consensus meeting. *Int Arch Allergy Immunol*. 2014;165(2):119-27.
2. Byrd JB, Woodard-Grice A, Stone E, Lucisano A, Schaefer H, Yu C, et al. Association of angiotensin-converting enzyme inhibitor-associated angioedema with transplant and immunosuppressant use. *Allergy*. 2010;65(11):1381-7.
3. Campbell DJ. Neprilysin Inhibitors and Bradykinin. *Front Med (Lausanne)*. 2018;5:257.
